# Supplementary material for: Easy sensing of lead and zinc in water using smart glass based on cationic porphyrin layers
Source: Royal Society of Chemistry journal article supplement (doi:10.1039/c8nj00736e), 2018-01-01
Supplement: c8nj00736e1.pdf [file c8nj00736e1.pdf]

## Supplementary materials

# Easy sensing of lead and zinc in water using smart glass based on cationic porphyrin layers

Chiara M. A. Gangemi,<sup>a</sup> Giulia Ognibene,<sup>a</sup> Rosalba Randazzo,<sup>a</sup> Alessandro D'Urso,<sup>a</sup> Roberto Purrello<sup>a</sup> and Maria Elena Fragalà<sup>b\*</sup>

<sup>a</sup>Dipartimento di Scienze Chimiche, Università degli Studi di Catania, Viale Andrea Doria, 6 – 95100 Catania (Italy)

<sup>b</sup>Dipartimento di Scienze Chimiche and INSTM UdR di Catania, Università degli Studi di Catania, Viale Andrea Doria, 6 – 95100 Catania (Italy)

## List of Supplementary Figures

**Fig. S1:** UV-Vis spectra of [H2T4] 1  $\mu$ M (black line) in ultrapure water pH= 7 (grey line) and of H2T4 deposited on glass (black line).

**Fig. S2:** UV-Vis spectra of [H2T4] 1  $\mu$ M (black line) in ultrapure water pH= 7 in presence of [Zn<sup>2+</sup>]= 500  $\mu$ M (red line) or 5 mM (green line). UV-Vis spectra of H2T4 solutions are recorded after 15 minutes from the addition of metal cation into the initial porphyrin solution

**Fig. S3:** UV-Vis spectra of [H2T4] 1  $\mu$ M (black line) in ultrapure water pH= 7 in presence of [Zn<sup>2+</sup>]= 5 mM after 1 hour (blue line) and 2 hours (red line).

**Fig. S4:** UV-Vis spectra of [H2T4] 1  $\mu$ M (black line) in ultrapure water pH= 7; in presence of [Zn<sup>2+</sup>]= 5 mM after 1 hour (blue line) and 2 hours (red line). UV-Vis spectra of H2T4 solutions are recorded after 15 minutes from the addition of metal cation into the initial porphyrin solution

**Fig. S5:** UV-Vis spectra of H2T4 1  $\mu$ M in water pH=7 (a) and related plot of A<sub>476</sub>/A<sub>422</sub> ratio (b), upon increasing [Pb<sup>2+</sup>]. UV-Vis spectra of H2T4 solutions are recorded after 15 minutes from the addition of metal cation into the initial porphyrin solution

**Fig. S6:** UV-Vis spectra of a) H2T4 deposited on glass (red curve) and H2T4 in solution after desorption in SDS 10% solution (black line); b) H2T4 deposited on glass after dipping (15 min) in aqueous solution containing [Pb<sup>2+</sup>]= 5  $\mu$ M (red curve) and after desorption in SDS 10% solution (black line); c) H2T4 deposited on glass after dipping (30 min) in aqueous solution containing [Zn<sup>2+</sup>]= 5  $\mu$ M (red curve) and after desorption in SDS 10% solution (black line).

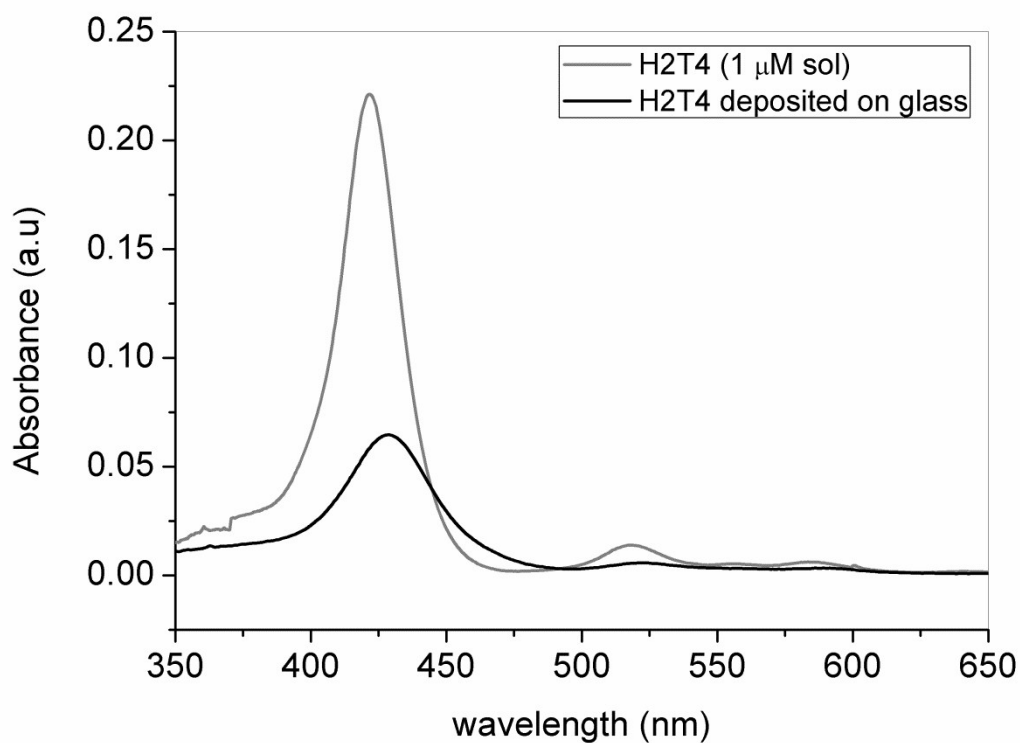

**Figure S1:** UV-Vis spectra of [H<sub>2</sub>T4] 1 μM (black line) in ultrapure water pH= 7 (grey line) and of H<sub>2</sub>T4 deposited on glass (black line).

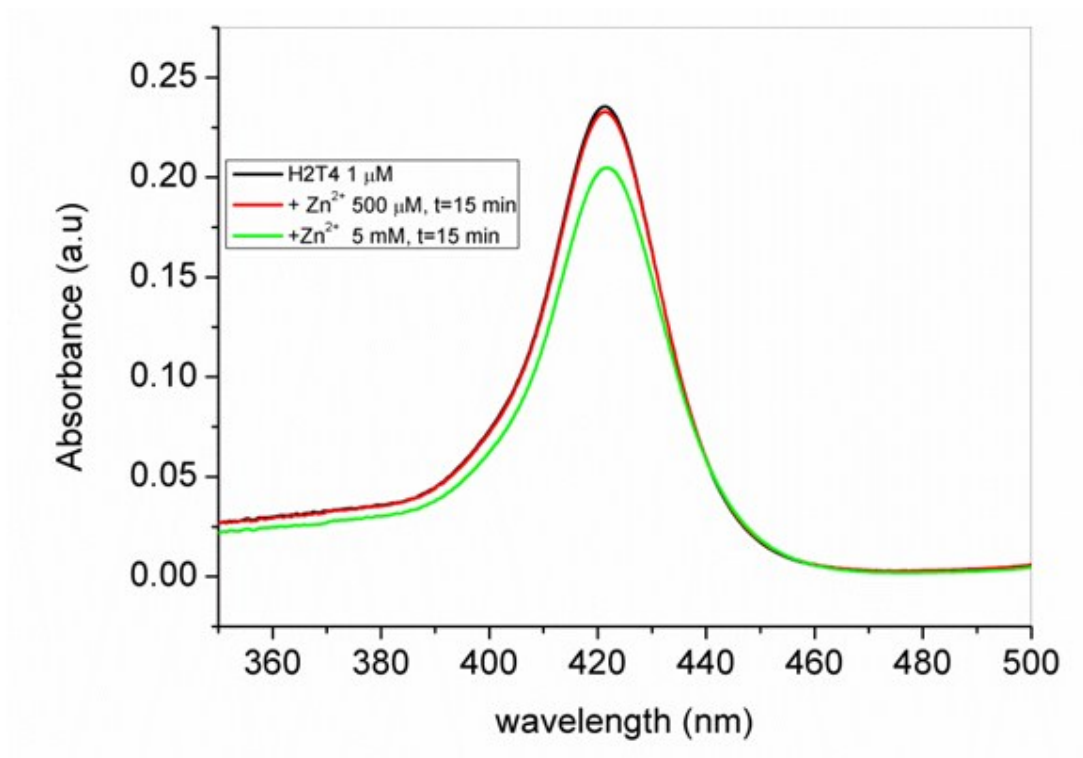

**Fig. S2:** UV-Vis spectra of [H<sub>2</sub>T4] 1 μM (black line) in ultrapure water pH= 7 in presence of [Zn<sup>2+</sup>] 500 μM (red line) or 5 mM (green line).

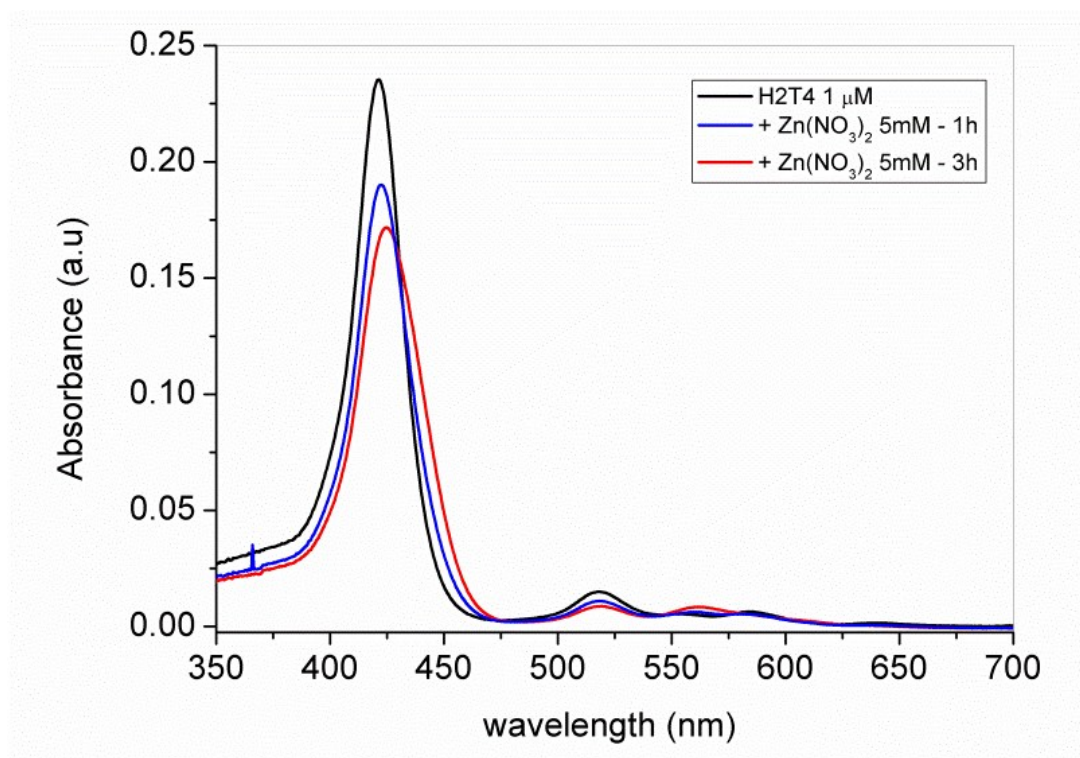

**Fig. S3:** UV-Vis spectra of [H2T4] 1  $\mu\text{M}$  (black line) in ultrapure water pH= 7; in presence of [ $\text{Zn}^{2+}$ ] 5 mM after 1 hour (blue line) and 2 hours (red line).

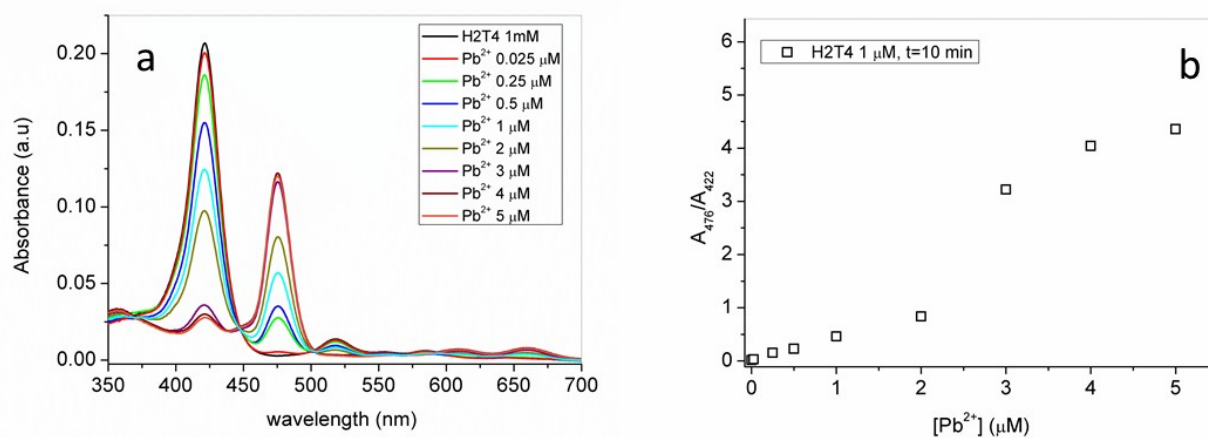

**Fig. S4:** UV-Vis spectra of H2T4 1  $\mu\text{M}$  in water pH=7 (a) and related plot of  $A_{476}/A_{422}$  ratio (b), upon increasing [ $\text{Pb}^{2+}$ ]

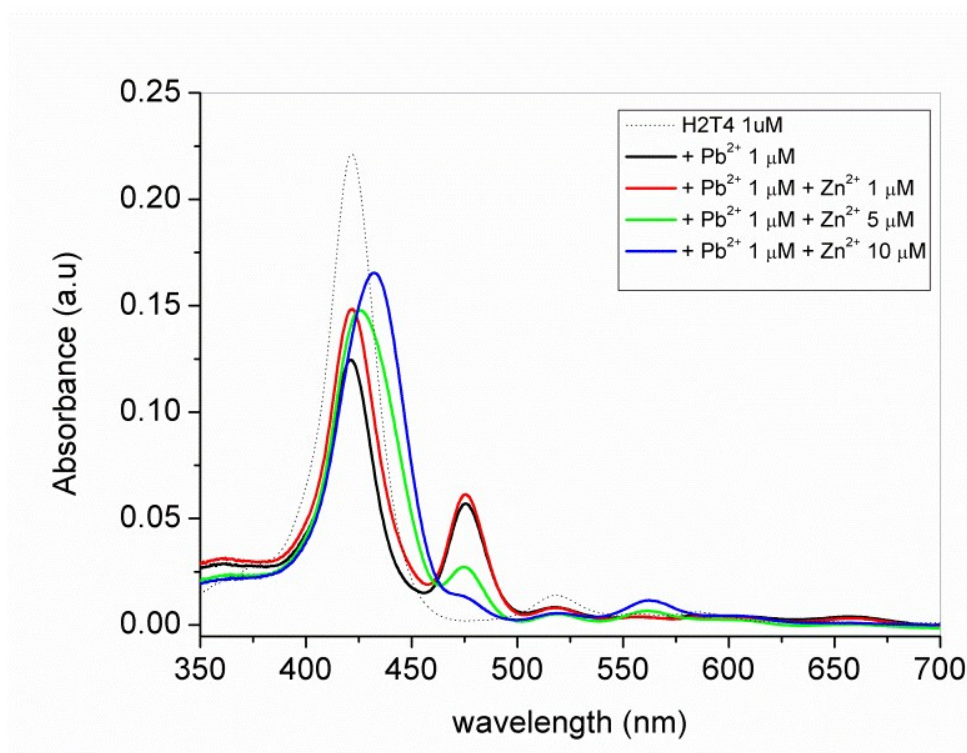

**Fig. S5:** UV-Vis spectra of bare H2T4 1  $\mu$ M in water pH=7 (dotted grey line), in presence of  $[Pb^{2+}]$ =1  $\mu$ M (black line) and after addition of  $[Zn^{2+}]$ =1  $\mu$ M (red line); 5  $\mu$ M (green line) and 10  $\mu$ M (blue line).

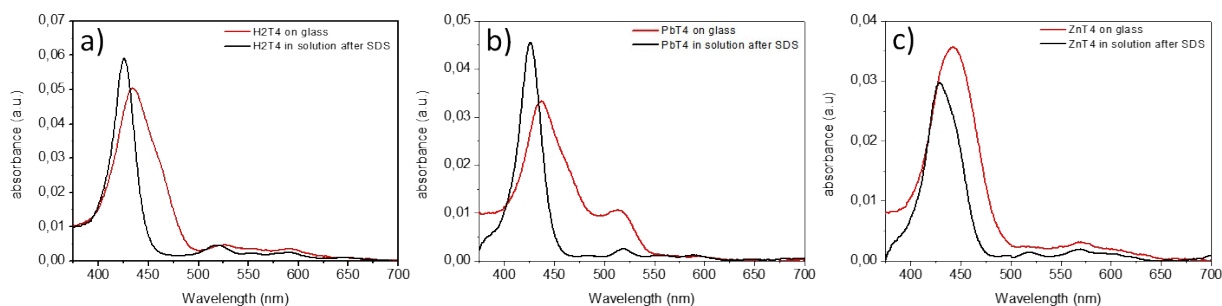

**Fig. S6:** UV-Vis spectra of a) H2T4 deposited on glass (red curve) and H2T4 in solution after desorption in SDS 10% solution (black line); b) H2T4 deposited on glass after dipping (15 min) in aqueous solution containing  $[Pb^{2+}]$ = 5  $\mu$ M (red curve) and after desorption in SDS 10% solution (black line); c) H2T4 deposited on glass after dipping (30 min) in aqueous solution containing  $[Zn^{2+}]$ = 5  $\mu$ M (red curve) and after desorption in SDS 10% solution (black line).
